# Supplementary material
Source: PubMed Central journal article supplement (PMC4793411)
Supplement: chas011692.ww1_default.pdf [file chas011692.ww1_default.pdf]

**Appendix 1** [posted as supplied by author]

**Table A. Rate ratios and excess suicides in 2008 relative to those expected based on trend 2000-2007 (n = 54 countries<sup>\*</sup>).**

| Country/age/sex group                                | Rate ratio (95% CI)    | Excess suicide (95% CI) | p      |
|------------------------------------------------------|------------------------|-------------------------|--------|
| <b>All study countries (n=54)</b>                    |                        |                         |        |
| All age groups                                       |                        |                         |        |
| Males                                                | 0.995 (0.990 to 1.000) | -774 (-1610 to 62)      | 0.070  |
| Females                                              | 0.994 (0.987 to 1.001) | -298 (-626 to 31)       | 0.075  |
| Aged 15-24                                           |                        |                         |        |
| Males                                                | 1.045 (1.027 to 1.065) | 831 (498 to 1163)       | <0.001 |
| Females                                              | 1.044 (1.005 to 1.086) | 230 (28 to 431)         | 0.026  |
| Aged 25-44                                           |                        |                         |        |
| Males                                                | 0.994 (0.979 to 1.008) | -344 (-1138 to 449)     | 0.40   |
| Females                                              | 1.018 (0.986 to 1.051) | 244 (-200 to 688)       | 0.28   |
| Aged 45-64                                           |                        |                         |        |
| Males                                                | 0.981 (0.959 to 1.003) | -1058 (-2285 to 170)    | 0.091  |
| Females                                              | 0.979 (0.957 to 1.001) | -328 (-673 to 17)       | 0.063  |
| Aged 65+                                             |                        |                         |        |
| Males                                                | 0.983 (0.952 to 1.017) | -506 (-1490 to 477)     | 0.31   |
| Females                                              | 0.969 (0.926 to 1.015) | -390 (-962 to 181)      | 0.18   |
| <b>European countries (n=27)</b>                     |                        |                         |        |
| All age groups                                       |                        |                         |        |
| Males                                                | 0.991 (0.984 to 0.998) | -653 (-1166 to -141)    | 0.013  |
| Females                                              | 1.001 (0.994 to 1.008) | 24 (-107 to 156)        | 0.72   |
| Aged 15-24                                           |                        |                         |        |
| Males                                                | 1.061 (1.025 to 1.100) | 460 (194 to 725)        | 0.001  |
| Females                                              | 1.109 (1.041 to 1.188) | 162 (65 to 260)         | 0.001  |
| Aged 25-44                                           |                        |                         |        |
| Males                                                | 0.990 (0.972 to 1.009) | -243 (-697 to 211)      | 0.29   |
| Females                                              | 1.012 (0.976 to 1.051) | 59 (-116 to 234)        | 0.51   |
| Aged 45-64                                           |                        |                         |        |
| Males                                                | 0.978 (0.950 to 1.008) | -557 (-1301 to 187)     | 0.14   |
| Females                                              | 0.978 (0.955 to 1.002) | -144 (-299 to 11)       | 0.069  |
| Aged 65+                                             |                        |                         |        |
| Males                                                | 1.017 (1.005 to 1.029) | 236 (71 to 401)         | 0.005  |
| Females                                              | 1.002 (0.980 to 1.024) | 10 (-123 to 142)        | 0.89   |
| <b>American countries (n=18)</b>                     |                        |                         |        |
| All age groups                                       |                        |                         |        |
| Males                                                | 1.048 (1.039 to 1.057) | 2335 (1901 to 2770)     | <0.001 |
| Females                                              | 1.026 (1.015 to 1.037) | 342 (199 to 485)        | <0.001 |
| Aged 15-24                                           |                        |                         |        |
| Males                                                | 1.027 (1.006 to 1.049) | 223 (48 to 399)         | 0.013  |
| Females                                              | 1.035 (0.995 to 1.080) | 83 (-13 to 180)         | 0.090  |
| Aged 25-44                                           |                        |                         |        |
| Males                                                | 1.018 (1.002 to 1.035) | 333 (29 to 636)         | 0.032  |
| Females                                              | 1.006 (0.985 to 1.028) | 29 (-72 to 130)         | 0.58   |
| Aged 45-64                                           |                        |                         |        |
| Males                                                | 1.035 (1.018 to 1.052) | 552 (297 to 807)        | <0.001 |
| Females                                              | 1.010 (0.985 to 1.036) | 47 (-75 to 168)         | 0.45   |
| Aged 65+                                             |                        |                         |        |
| Males                                                | 1.032 (1.015 to 1.050) | 236 (111 to 361)        | <0.001 |
| Females                                              | 1.022 (0.991 to 1.055) | 31 (-12 to 74)          | 0.16   |
| <b>Non-European and non-American countries (n=9)</b> |                        |                         |        |
| All age groups                                       |                        |                         |        |
| Males                                                | 0.933 (0.921 to 0.946) | -2456 (-2954 to -1958)  | <0.001 |
| Females                                              | 0.956 (0.940 to 0.973) | -664 (-929 to -399)     | <0.001 |
| Aged 15-24                                           |                        |                         |        |
| Males                                                | 1.058 (1.020 to 1.099) | 148 (52 to 244)         | 0.003  |
| Females                                              | 0.988 (0.893 to 1.106) | -16 (-164 to 132)       | 0.83   |
| Aged 25-44                                           |                        |                         |        |
| Males                                                | 0.961 (0.913 to 1.014) | -434 (-1010 to 142)     | 0.14   |
| Females                                              | 1.035 (0.951 to 1.134) | 156 (-238 to 551)       | 0.44   |
| Aged 45-64                                           |                        |                         |        |
| Males                                                | 0.926 (0.868 to 0.992) | -1052 (-1995 to -110)   | 0.029  |
| Females                                              | 0.944 (0.883 to 1.014) | -231 (-514 to 53)       | 0.11   |
| Aged 65+                                             |                        |                         |        |
| Males                                                | 0.888 (0.801 to 0.998) | -978 (-1939 to -16)     | 0.046  |
| Females                                              | 0.915 (0.826 to 1.027) | -431 (-985 to 123)      | 0.13   |

<sup>\*</sup>As listed in figure 1. Two countries (Belize and Kuwait) had no suicides in certain sex/age groups in 2000-2009 and thus were excluded from analyses stratified by sex and age group. The sum of age-specific excess suicides was not exactly equal to all-age excess suicides because age-specific estimates were based on age-specific time-trends, which may differ from trends in all-age suicide rates.

Table B. Rate ratios and excess suicides in 2010 relative to those expected based on trend 2000-2007, in 29 countries where data were available (as listed in figure 1)\*.

| Country/age/sex group        | Rate ratio (95% CI)    | Excess suicide (95% CI) | p      |
|------------------------------|------------------------|-------------------------|--------|
| All study countries (n=29)   |                        |                         |        |
| All age groups               |                        |                         |        |
| Males                        | 0.999 (0.991 to 1.007) | -85 (-725 to 555)       | 0.79   |
| Females                      | 0.955 (0.943 to 0.968) | -1230 (-1586 to -874)   | <0.001 |
| Aged 15-24                   |                        |                         |        |
| Males                        | 1.060 (1.020 to 1.103) | 435 (150 to 720)        | 0.003  |
| Females                      | 0.850 (0.781 to 0.931) | -435 (-688 to -182)     | 0.001  |
| Aged 25-44                   |                        |                         |        |
| Males                        | 1.020 (0.985 to 1.058) | 481 (-381 to 1343)      | 0.27   |
| Females                      | 0.956 (0.884 to 1.040) | -350 (-989 to 290)      | 0.28   |
| Aged 45-64                   |                        |                         |        |
| Males                        | 1.007 (0.954 to 1.066) | 201 (-1356 to 1758)     | 0.80   |
| Females                      | 1.018 (0.962 to 1.080) | 144 (-323 to 612)       | 0.55   |
| Aged 65+                     |                        |                         |        |
| Males                        | 0.923 (0.843 to 1.019) | -1407 (-3127 to 313)    | 0.11   |
| Females                      | 0.948 (0.849 to 1.073) | -429 (-1393 to 534)     | 0.38   |
| European countries (n=20)    |                        |                         |        |
| All age groups               |                        |                         |        |
| Males                        | 1.108 (1.101 to 1.116) | 2993 (2813 to 3173)     | <0.001 |
| Females                      | 1.048 (1.038 to 1.058) | 382 (303 to 461)        | <0.001 |
| Aged 15-24                   |                        |                         |        |
| Males                        | 1.204 (1.163 to 1.247) | 423 (351 to 496)        | <0.001 |
| Females                      | 1.090 (1.000 to 1.197) | 45 (0 to 90)            | 0.050  |
| Aged 25-44                   |                        |                         |        |
| Males                        | 1.112 (1.074 to 1.153) | 901 (616 to 1186)       | <0.001 |
| Females                      | 1.052 (1.003 to 1.106) | 94 (5 to 183)           | 0.038  |
| Aged 45-64                   |                        |                         |        |
| Males                        | 1.126 (1.082 to 1.174) | 1361 (921 to 1802)      | <0.001 |
| Females                      | 1.041 (0.998 to 1.088) | 127 (-6 to 260)         | 0.062  |
| Aged 65+                     |                        |                         |        |
| Males                        | 1.040 (1.020 to 1.061) | 272 (141 to 403)        | <0.001 |
| Females                      | 1.042 (0.995 to 1.094) | 110 (-13 to 233)        | 0.079  |
| Non-European countries (n=9) |                        |                         |        |
| All age groups               |                        |                         |        |
| Males                        | 0.938 (0.927 to 0.950) | -3078 (-3692 to -2464)  | <0.001 |
| Females                      | 0.917 (0.900 to 0.933) | -1612 (-1959 to -1264)  | <0.001 |
| Aged 15-24                   |                        |                         |        |
| Males                        | 1.002 (0.952 to 1.058) | 11 (-264 to 287)        | 0.94   |
| Females                      | 0.800 (0.724 to 0.892) | -480 (-728 to -231)     | <0.001 |
| Aged 25-44                   |                        |                         |        |
| Males                        | 0.974 (0.927 to 1.026) | -420 (-1234 to 393)     | 0.31   |
| Females                      | 0.927 (0.839 to 1.035) | -444 (-1077 to 190)     | 0.17   |
| Aged 45-64                   |                        |                         |        |
| Males                        | 0.933 (0.859 to 1.021) | -1160 (-2654 to 333)    | 0.13   |
| Females                      | 1.003 (0.921 to 1.102) | 17 (-431 to 465)        | 0.94   |
| Aged 65+                     |                        |                         |        |
| Males                        | 0.854 (0.743 to 1.004) | -1680 (-3395 to 36)     | 0.055  |
| Females                      | 0.905 (0.775 to 1.088) | -540 (-1496 to 416)     | 0.27   |

\*The sum of age-specific excess suicides was not exactly equal to all-age excess suicides because age-specific estimates were based on age-specific time-trends, which may differ from trends in all-age suicide rates.

Table C. Results by country: rate ratios and excess suicides in 2008 relative to those expected based on trends over 2000-2007.

| Country                                        | Males      |                  |                |                  | Females |            |                  |                | Population aged 15+ (2008)** |          |         |
|------------------------------------------------|------------|------------------|----------------|------------------|---------|------------|------------------|----------------|------------------------------|----------|---------|
|                                                | Rate ratio | (95% CI)         | Excess suicide | (95% CI)         | p       | Rate ratio | (95% CI)         | Excess suicide |                              | (95% CI) | p       |
| European countries (n=27)                      |            |                  |                |                  |         |            |                  |                |                              |          |         |
| Old (pre-2004) EU* countries (n=11)            |            |                  |                |                  |         |            |                  |                |                              |          |         |
| All countries                                  | 1.030      | (1.023 to 1.037) | 725            | (567 to 883)     | <0.001  | 0.992      | (0.983 to 1.001) | -69            | (-146 to 8)                  | 0.078    | 257,350 |
| Austria                                        | 1.003      | (0.980 to 1.027) | 3              | (-20 to 25)      | 0.82    | 1.039      | (0.999 to 1.083) | 11             | (0 to 23)                    | 0.054    | 7,067   |
| Finland                                        | 1.107      | (1.077 to 1.139) | 77             | (57 to 97)       | <0.001  | 0.945      | (0.903 to 0.991) | -13            | (-25 to -2)                  | 0.021    | 4,421   |
| France                                         | 1.018      | (1.004 to 1.032) | 136            | (34 to 238)      | 0.009   | 0.984      | (0.967 to 1.001) | -45            | (-93 to 3)                   | 0.021    | 50,693  |
| Germany                                        | 1.006      | (0.994 to 1.018) | 40             | (-42 to 123)     | 0.34    | 0.992      | (0.976 to 1.008) | -19            | (-59 to 20)                  | 0.29     | 70,908  |
| Greece                                         | 1.026      | (0.981 to 1.075) | 8              | (-6 to 22)       | 0.27    | 0.988      | (0.895 to 1.103) | -1             | (-8 to 6)                    | 0.81     | 9,630   |
| Ireland                                        | 1.088      | (1.052 to 1.127) | 31             | (19 to 43)       | <0.001  | 1.355      | (1.261 to 1.464) | 31             | (25 to 38)                   | <0.001   | 3,510   |
| Luxembourg                                     | 0.803      | (0.727 to 0.895) | -10            | (-15 to -5)      | <0.001  | 0.430      | (0.354 to 0.547) | -11            | (-15 to -7)                  | <0.001   | 400     |
| Netherlands                                    | 0.977      | (0.955 to 1.001) | -23            | (-47 to 1)       | 0.064   | 1.006      | (0.968 to 1.046) | 3              | (-15 to 20)                  | 0.80     | 13,516  |
| Spain                                          | 1.064      | (1.044 to 1.085) | 161            | (113 to 209)     | <0.001  | 0.985      | (0.960 to 1.012) | -12            | (-32 to 9)                   | 0.28     | 38,898  |
| Sweden                                         | 1.049      | (1.022 to 1.078) | 40             | (18 to 62)       | <0.001  | 0.874      | (0.836 to 0.915) | -45            | (-61 to -29)                 | <0.001   | 7,678   |
| United Kingdom                                 | 1.086      | (1.067 to 1.106) | 262            | (207 to 317)     | <0.001  | 1.034      | (1.004 to 1.065) | 31             | (4 to 58)                    | 0.041    | 50,629  |
| New (post-2004) EU* countries (n=10)           |            |                  |                |                  |         |            |                  |                |                              |          |         |
| All countries                                  | 1.023      | (1.014 to 1.033) | 282            | (168 to 397)     | <0.001  | 1.038      | (1.021 to 1.054) | 99             | (58 to 141)                  | <0.001   | 82,626  |
| Bulgaria                                       | 1.111      | (1.078 to 1.145) | 69             | (50 to 88)       | <0.001  | 1.225      | (1.168 to 1.288) | 45             | (35 to 55)                   | <0.001   | 6,601   |
| Czech Republic                                 | 0.957      | (0.931 to 0.984) | -50            | (-83 to -18)     | 0.002   | 1.069      | (1.022 to 1.121) | 16             | (5 to 28)                    | 0.005    | 8,950   |
| Estonia                                        | 1.007      | (0.959 to 1.061) | 1              | (-8 to 11)       | 0.786   | 1.223      | (1.121 to 1.346) | 9              | (6 to 13)                    | <0.001   | 1,141   |
| Hungary                                        | 1.082      | (1.059 to 1.106) | 144            | (106 to 182)     | <0.001  | 1.070      | (1.031 to 1.112) | 37             | (17 to 57)                   | <0.001   | 8,537   |
| Latvia                                         | 1.237      | (1.192 to 1.285) | 82             | (69 to 95)       | <0.001  | 1.205      | (1.139 to 1.280) | 17             | (12 to 22)                   | <0.001   | 1,955   |
| Lithuania                                      | 1.094      | (1.060 to 1.131) | 79             | (52 to 106)      | <0.001  | 1.107      | (1.051 to 1.168) | 19             | (9 to 28)                    | <0.001   | 2,847   |
| Malta                                          | 0.559      | (0.474 to 0.682) | -9             | (-13 to -6)      | <0.001  | 0.724      | (0.528 to 1.150) | -1             | (-2 to 0)                    | 0.14     | 3,464   |
| Poland                                         | 1.015      | (0.998 to 1.032) | 69             | (-12 to 151)     | 0.093   | 0.982      | (0.952 to 1.014) | -14            | (-40 to 11)                  | 0.42     | 32,253  |
| Romania                                        | 0.967      | (0.944 to 0.990) | -69            | (-119 to -20)    | 0.006   | 0.973      | (0.938 to 1.011) | -12            | (-29 to 5)                   | 0.15     | 18,239  |
| Slovenia                                       | 0.908      | (0.872 to 0.946) | -33            | (-48 to -18)     | <0.001  | 0.834      | (0.784 to 0.891) | -17            | (-23 to -10)                 | <0.001   | 1,757   |
| Non-EU* European countries (n=6)               |            |                  |                |                  |         |            |                  |                |                              |          |         |
| All countries                                  | 0.953      | (0.940 to 0.966) | -1660          | (-2135 to -1186) | <0.001  | 0.999      | (0.987 to 1.012) | -6             | (-104 to 92)                 | 0.90     | 138,033 |
| Croatia                                        | 1.092      | (1.051 to 1.137) | 51             | (30 to 73)       | <0.001  | 0.920      | (0.875 to 0.971) | -16            | (-26 to -6)                  | 0.003    | 3,751   |
| Iceland                                        | 1.198      | (1.048 to 1.399) | 4              | (1 to 8)         | 0.007   | 1.270      | (1.029 to 1.657) | 2              | (0 to 4)                     | 0.009    | 253     |
| Norway                                         | 1.003      | (0.966 to 1.042) | 1              | (-12 to 14)      | 0.88    | 0.969      | (0.911 to 1.034) | -5             | (-15 to 5)                   | 0.33     | 3,858   |
| Republic of Moldova                            | 0.990      | (0.952 to 1.032) | -5             | (-26 to 16)      | 0.64    | 1.111      | (1.021 to 1.217) | 10             | (2 to 18)                    | 0.014    | 2,951   |
| Russian Federation                             | 0.950      | (0.936 to 0.964) | -1651          | (-2123 to -1178) | <0.001  | 1.000      | (0.986 to 1.014) | -1             | (-97 to 95)                  | 0.82     | 120,998 |
| Serbia                                         | 0.936      | (0.914 to 0.959) | -61            | (-85 to -38)     | <0.001  | 1.009      | (0.970 to 1.052) | 3              | (-12 to 19)                  | 0.67     | 6,222   |
| American countries (n=18)                      |            |                  |                |                  |         |            |                  |                |                              |          |         |
| North American countries (n=2)                 |            |                  |                |                  |         |            |                  |                |                              |          |         |
| All countries                                  | 1.066      | (1.051 to 1.082) | 1930           | (1516 to 2345)   | <0.001  | 1.025      | (1.010 to 1.041) | 208            | (81 to 335)                  | 0.001    | 270,642 |
| Canada                                         | 1.023      | (1.005 to 1.042) | 62             | (13 to 110)      | 0.013   | 1.055      | (1.026 to 1.085) | 47             | (23 to 72)                   | 0.24     | 27,708  |
| United States                                  | 1.071      | (1.054 to 1.088) | 1869           | (1457 to 2280)   | <0.001  | 1.022      | (1.005 to 1.040) | 161            | (36 to 286)                  | 0.23     | 242,934 |
| Caribbean and Central American countries (n=9) |            |                  |                |                  |         |            |                  |                |                              |          |         |
| All countries                                  | 1.023      | (1.013 to 1.035) | 141            | (76 to 205)      | <0.001  | 1.148      | (1.120 to 1.178) | 190            | (157 to 223)                 | <0.001   | 108,368 |
| Aruba                                          | 0.446      | (0.336 to 0.663) | -4             | (-6 to -2)       | 0.001   | 0.592      | (0.356 to 1.749) | -1             | (-2 to 0)                    | 0.77     | 84      |
| Belize                                         | 1.452      | (1.156 to 1.952) | 3              | (1 to 5)         | 0.001   | 0.920      | (0.600 to 1.970) | 0              | (-1 to 0)                    | 0.13     | 190     |
| Costa Rica                                     | 0.821      | (0.778 to 0.870) | -49            | (-65 to -34)     | <0.001  | 0.612      | (0.541 to 0.706) | -20            | (-27 to -13)                 | <0.001   | 3,345   |
| Cuba                                           | 1.063      | (1.037 to 1.090) | 63             | (38 to 88)       | <0.001  | 1.263      | (1.215 to 1.316) | 64             | (54 to 74)                   | <0.001   | 9,223   |
| El Salvador                                    | 1.039      | (0.987 to 1.098) | 14             | (-5 to 33)       | 0.15    | 1.133      | (1.068 to 1.206) | 13             | (7 to 19)                    | 0.84     | 4,083   |
| Guatemala                                      | 1.397      | (1.320 to 1.484) | 103            | (88 to 118)      | <0.001  | 1.573      | (1.410 to 1.778) | 38             | (31 to 46)                   | <0.001   | 7,915   |
| Mexico                                         | 1.009      | (0.995 to 1.023) | 32             | (-18 to 81)      | 0.21    | 1.069      | (1.030 to 1.111) | 51             | (23 to 79)                   | <0.001   | 77,503  |
| Nicaragua                                      | 0.984      | (0.938 to 1.035) | -4             | (-18 to 9)       | 0.52    | 1.530      | (1.403 to 1.683) | 34             | (28 to 40)                   | <0.001   | 3,625   |
| Panama                                         | 0.895      | (0.842 to 0.956) | -17            | (-28 to 7)       | 0.001   | 1.552      | (1.363 to 1.802) | 11             | (8 to 13)                    | <0.001   | 2,400   |
| South American countries (n=7)                 |            |                  |                |                  |         |            |                  |                |                              |          |         |
| All countries                                  | 1.019      | (1.011 to 1.028) | 265            | (151 to 379)     | <0.001  | 0.985      | (0.969 to 1.000) | -56            | (-113 to 1)                  | 0.053    | 229,533 |
| Argentina                                      | 1.032      | (1.004 to 1.060) | 74             | (10 to 137)      | 0.023   | 0.994      | (0.955 to 1.036) | -4             | (-28 to 21)                  | <0.001   | 29,618  |
| Brazil                                         | 1.007      | (0.996 to 1.017) | 48             | (-26 to 121)     | 0.20    | 0.984      | (0.965 to 1.005) | -29            | (-68 to 9)                   | <0.001   | 141,158 |
| Chile                                          | 1.097      | (1.072 to 1.122) | 146            | (112 to 181)     | <0.001  | 1.160      | (1.105 to 1.220) | 55             | (38 to 72)                   | <0.001   | 12,909  |
| Colombia                                       | 1.072      | (1.051 to 1.095) | 117            | (84 to 149)      | <0.001  | 0.982      | (0.933 to 1.037) | -7             | (-29 to 14)                  | <0.001   | 31,710  |
| Ecuador                                        | 0.853      | (0.818 to 0.891) | -112           | (-144 to -79)    | <0.001  | 0.797      | (0.752 to 0.847) | -59            | (-77 to -42)                 | <0.001   | 9,687   |
| Paraguay                                       | 0.854      | (0.798 to 0.919) | -27            | (-40 to -14)     | <0.001  | 0.760      | (0.682 to 0.859) | -17            | (-26 to -9)                  | 0.017    | 4,086   |
| Suriname                                       | 1.210      | (1.108 to 1.334) | 19             | (11 to 28)       | <0.001  | 1.221      | (1.033 to 1.493) | 6              | (1 to 11)                    | <0.001   | 365     |
| East Asian countries (n=4)                     |            |                  |                |                  |         |            |                  |                |                              |          |         |
| All countries                                  | 0.925      | (0.911 to 0.939) | -2458          | (-2950 to -1966) | <0.001  | 0.949      | (0.932 to 0.967) | -730           | (-993 to -467)               | <0.001   | 158,741 |
| Hong Kong SAR                                  | 0.748      | (0.714 to 0.786) | -179           | (-213 to -145)   | <0.001  | 0.834      | (0.798 to 0.875) | -68            | (-86 to -49)                 | 0.12     | 6,075   |
| Japan                                          | 0.962      | (0.946 to 0.978) | -848           | (-1213 to -484)  | <0.001  | 0.991      | (0.970 to 1.012) | -81            | (-269 to 107)                | <0.001   | 108,931 |
| Republic of Korea                              | 0.854      | (0.825 to 0.884) | -1414          | (-1743 to -1085) | <0.001  | 0.891      | (0.861 to 0.925) | -557           | (-740 to -373)               | <0.001   | 40,763  |
| Singapore                                      | 0.924      | (0.875 to 0.979) | -17            | (-29 to -4)      | 0.008   | 0.820      | (0.766 to 0.883) | -25            | (-34 to -15)                 | <0.001   | 2,972   |
| Other Asian countries (n=4)                    |            |                  |                |                  |         |            |                  |                |                              |          |         |
| All countries                                  | 1.003      | (0.984 to 1.023) | 12             | (-61 to 85)      | 0.75    | 1.095      | (1.062 to 1.131) | 79             | (53 to 106)                  | <0.001   | 22,701  |
| Israel                                         | 1.065      | (1.022 to 1.111) | 18             | (6 to 29)        | 0.002   | 0.668      | (0.615 to 0.730) | -28            | (-36 to -21)                 | <0.001   | 5,234   |
| Kazakhstan                                     | 0.990      | (0.968 to 1.012) | -33            | (-103 to 38)     | 0.37    | 1.161      | (1.120 to 1.205) | 104            | (80 to 127)                  | 0.93     | 11,904  |
| Kuwait                                         | 0.792      | (0.688 to 0.933) | -9             | (-15 to -2)      | 0.007   | 0.989      | (0.796 to 1.305) | 0              | (-4 to 3)                    | 0.56     | 1,900   |
| Kyrgyzstan                                     | 1.109      | (1.061 to 1.161) | 35             | (21 to 50)       | <0.001  | 1.047      | (0.949 to 1.167) | 4              | (-5 to 13)                   | <0.001   | 3,663   |
| African countries (n=1)                        |            |                  |                |                  |         |            |                  |                |                              |          |         |
| Mauritius                                      | 0.875      | (0.806 to 0.955) | -10            | (-17 to -3)      | 0.004   | 0.451      | (0.397 to 0.524) | -13            | (-17 to -10)                 | <0.001   | 954     |

\* European Union. \*\* 1000 population. \*\*\* The total number of suicide was zero.

Table D. Results by country: rate ratios and excess suicides in 2010 relative to those expected based on trends over 2000-2007.

| Country                      | Males      |                  |                         |        | Females    |                  |                         |        |
|------------------------------|------------|------------------|-------------------------|--------|------------|------------------|-------------------------|--------|
|                              | Rate ratio | (95% CI)         | Excess suicide (95% CI) | p      | Rate ratio | (95% CI)         | Excess suicide (95% CI) | p      |
| European countries (n=20)    |            |                  |                         |        |            |                  |                         |        |
| Austria                      | 1.061      | (1.034 to 1.089) | 56 (32 to 79)           | <0.001 | 1.111      | (1.063 to 1.163) | 29 (17 to 41)           | <0.001 |
| Bulgaria                     | 1.173      | (1.134 to 1.214) | 95 (77 to 114)          | <0.001 | 1.247      | (1.182 to 1.319) | 42 (32 to 51)           | <0.001 |
| Croatia                      | 1.122      | (1.075 to 1.173) | 63 (41 to 86)           | <0.001 | 1.012      | (0.956 to 1.075) | 2 (-9 to 13)            | 0.69   |
| Czech Republic               | 1.083      | (1.050 to 1.118) | 95 (59 to 132)          | <0.001 | 1.187      | (1.130 to 1.251) | 41 (29 to 52)           | <0.001 |
| Estonia                      | 1.112      | (1.051 to 1.180) | 18 (9 to 28)            | <0.001 | 1.184      | (1.075 to 1.317) | 7 (3 to 10)             | <0.001 |
| Finland                      | 1.045      | (1.014 to 1.079) | 31 (10 to 52)           | 0.004  | 1.000      | (0.950 to 1.056) | 0 (-12 to 12)           | 1.00   |
| Germany                      | 1.113      | (1.099 to 1.128) | 757 (669 to 844)        | <0.001 | 1.120      | (1.100 to 1.141) | 274 (232 to 315)        | <0.001 |
| Latvia                       | 1.259      | (1.208 to 1.314) | 77 (64 to 90)           | <0.001 | 0.867      | (0.814 to 0.927) | -9 (-14 to -5)          | <0.001 |
| Lithuania                    | 1.156      | (1.115 to 1.200) | 112 (86 to 138)         | <0.001 | 1.256      | (1.187 to 1.333) | 38 (30 to 47)           | <0.001 |
| Malta                        | 1.244      | (1.035 to 1.559) | 6 (1 to 10)             | 0.018  | 0.950      | (0.670 to 1.629) | 0 (-1 to 1)             | 0.81   |
| Netherlands                  | 1.113      | (1.084 to 1.144) | 114 (86 to 141)         | <0.001 | 1.101      | (1.055 to 1.150) | 43 (25 to 62)           | <0.001 |
| Norway                       | 1.134      | (1.088 to 1.185) | 45 (31 to 60)           | <0.001 | 0.952      | (0.890 to 1.024) | -8 (-20 to 4)           | 0.18   |
| Poland                       | 1.175      | (1.152 to 1.199) | 819 (726 to 912)        | <0.001 | 1.063      | (1.025 to 1.103) | 49 (21 to 78)           | 0.001  |
| Republic of Moldova          | 1.096      | (1.047 to 1.149) | 51 (26 to 75)           | <0.001 | 1.065      | (0.970 to 1.180) | 6 (-3 to 15)            | 0.19   |
| Romania                      | 1.142      | (1.112 to 1.173) | 284 (231 to 338)        | <0.001 | 1.031      | (0.991 to 1.076) | 14 (-4 to 32)           | 0.14   |
| Serbia                       | 0.960      | (0.935 to 0.986) | -38 (-63 to -13)        | 0.003  | 0.820      | (0.784 to 0.860) | -67 (-84 to -50)        | <0.001 |
| Slovenia                     | 1.010      | (0.965 to 1.059) | 3 (-12 to 19)           | 0.67   | 0.843      | (0.787 to 0.908) | -14 (-21 to -8)         | <0.001 |
| Spain                        | 1.008      | (0.988 to 1.030) | 20 (-30 to 71)          | 0.43   | 0.893      | (0.867 to 0.921) | -83 (-106 to -60)       | <0.001 |
| Sweden                       | 1.021      | (0.991 to 1.053) | 17 (-7 to 42)           | 0.17   | 0.827      | (0.788 to 0.871) | -63 (-81 to -45)        | <0.001 |
| United Kingdom               | 1.110      | (1.087 to 1.133) | 318 (259 to 378)        | <0.001 | 1.089      | (1.055 to 1.126) | 79 (50 to 107)          | <0.001 |
| Non-European countries (n=9) |            |                  |                         |        |            |                  |                         |        |
| Argentina                    | 0.970      | (0.941 to 1.001) | -73 (-147 to 2)         | 0.055  | 0.911      | (0.871 to 0.955) | -53 (-81 to -26)        | <0.001 |
| Brazil                       | 0.963      | (0.952 to 0.974) | -280 (-368 to -192)     | <0.001 | 0.998      | (0.976 to 1.022) | -3 (-51 to 44)          | 0.88   |
| Cuba                         | 1.289      | (1.254 to 1.327) | 275 (248 to 302)        | <0.001 | 1.602      | (1.533 to 1.677) | 121 (112 to 130)        | <0.001 |
| Ecuador                      | 0.687      | (0.655 to 0.722) | -288 (-333 to -243)     | <0.001 | 0.686      | (0.640 to 0.739) | -108 (-133 to -83)      | <0.001 |
| Japan                        | 0.947      | (0.931 to 0.965) | -1156 (-1556 to -757)   | <0.001 | 0.991      | (0.968 to 1.014) | -80 (-277 to 118)       | 0.43   |
| Mauritius                    | 0.947      | (0.864 to 1.048) | -4 (-12 to 3)           | 0.28   | 0.951      | (0.820 to 1.131) | -1 (-5 to 3)            | 0.55   |
| Mexico                       | 1.000      | (0.985 to 1.016) | 0 (-60 to 60)           | 1.00   | 1.043      | (0.998 to 1.093) | 34 (-2 to 71)           | 0.064  |
| Nicaragua                    | 0.959      | (0.908 to 1.016) | -12 (-27 to 4)          | 0.15   | 1.253      | (1.128 to 1.409) | 14 (8 to 20)            | <0.001 |
| Republic of Korea            | 0.960      | (0.928 to 0.995) | -425 (-799 to -51)      | 0.026  | 0.837      | (0.804 to 0.872) | -1015 (-1268 to -762)   | <0.001 |

Table E. Rate ratios and excess suicides (suicides and undetermined deaths combined) in 2009 relative to those expected based on trend 2000-2007 (n = 54 countries\*).

| Age/sex group  | Rate ratio (95% CI)    | Excess suicide (95% CI) | p      |
|----------------|------------------------|-------------------------|--------|
| All age groups |                        |                         |        |
| Males          | 1.037 (1.032 to 1.043) | 6957 (5940 to 7974)     | <0.001 |
| Females        | 0.995 (0.988 to 1.002) | -311 (-733 to 111)      | 0.15   |
| Aged 15-24     |                        |                         |        |
| Males          | 1.079 (1.047 to 1.114) | 1747 (1062 to 2432)     | <0.001 |
| Females        | 1.015 (0.976 to 1.057) | 90 (-157 to 337)        | 0.47   |
| Aged 25-44     |                        |                         |        |
| Males          | 1.056 (1.034 to 1.079) | 3533 (2185 to 4881)     | <0.001 |
| Females        | 1.009 (0.977 to 1.043) | 148 (-397 to 693)       | 0.59   |
| Aged 45-64     |                        |                         |        |
| Males          | 1.029 (1.004 to 1.055) | 1854 (254 to 3454)      | 0.023  |
| Females        | 0.995 (0.972 to 1.018) | -101 (-538 to 335)      | 0.65   |
| Aged 65+       |                        |                         |        |
| Males          | 0.982 (0.941 to 1.026) | -658 (-2202 to 887)     | 0.40   |
| Females        | 0.968 (0.915 to 1.027) | -548 (-1527 to 430)     | 0.27   |

\* As listed in figure 1. Two countries (Belize and Kuwait) had no suicides in certain sex/age groups in 2000-2009 and thus were excluded from analyses stratified by sex and age group. The sum of age-specific excess suicides was not exactly equal to all-age excess suicides because age-specific estimates were based on age-specific time-trends, which may differ from trends in all-age suicide rates.

Table F. Rate ratios and excess suicides in 2009 relative to those expected based on trend 2000-2006 (n = 54 countries\*).

| Country/age/sex group                         | Rate ratio (95% CI)    | Excess suicide (95% CI) | p      |
|-----------------------------------------------|------------------------|-------------------------|--------|
| All study countries (n=54)                    |                        |                         |        |
| All age groups                                |                        |                         |        |
| Males                                         | 1.014 (1.007 to 1.020) | 2168 (1131 to 3205)     | <0.001 |
| Females                                       | 0.986 (0.977 to 0.994) | -688 (-1096 to -279)    | 0.001  |
| Aged 15-24                                    |                        |                         |        |
| Males                                         | 1.054 (1.030 to 1.080) | 973 (550 to 1396)       | <0.001 |
| Females                                       | 1.005 (0.954 to 1.061) | 25 (-258 to 308)        | 0.86   |
| Aged 25-44                                    |                        |                         |        |
| Males                                         | 1.027 (0.999 to 1.056) | 1452 (-57 to 2961)      | 0.059  |
| Females                                       | 1.025 (0.973 to 1.084) | 352 (-401 to 1105)      | 0.36   |
| Aged 45-64                                    |                        |                         |        |
| Males                                         | 0.996 (0.962 to 1.033) | -236 (-2279 to 1808)    | 0.82   |
| Females                                       | 0.979 (0.941 to 1.021) | -328 (-979 to 323)      | 0.32   |
| Aged 65+                                      |                        |                         |        |
| Males                                         | 0.960 (0.902 to 1.027) | -1215 (-3193 to 763)    | 0.23   |
| Females                                       | 0.939 (0.864 to 1.028) | -786 (-1897 to 325)     | 0.17   |
| European countries (n=27)                     |                        |                         |        |
| All age groups                                |                        |                         |        |
| Males                                         | 1.019 (1.010 to 1.028) | 1351 (745 to 1957)      | <0.001 |
| Females                                       | 0.989 (0.981 to 0.997) | -206 (-354 to -58)      | 0.006  |
| Aged 15-24                                    |                        |                         |        |
| Males                                         | 1.138 (1.092 to 1.188) | 938 (653 to 1222)       | <0.001 |
| Females                                       | 1.118 (1.068 to 1.174) | 164 (98 to 230)         | <0.001 |
| Aged 25-44                                    |                        |                         |        |
| Males                                         | 1.036 (1.002 to 1.072) | 870 (47 to 1694)        | 0.038  |
| Females                                       | 1.001 (0.952 to 1.054) | 4 (-233 to 240)         | 0.98   |
| Aged 45-64                                    |                        |                         |        |
| Males                                         | 1.000 (0.958 to 1.045) | -8 (-1134 to 1118)      | 0.99   |
| Females                                       | 0.967 (0.935 to 1.000) | -222 (-446 to 3)        | 0.053  |
| Aged 65+                                      |                        |                         |        |
| Males                                         | 1.010 (0.989 to 1.032) | 135 (-155 to 424)       | 0.36   |
| Females                                       | 0.988 (0.952 to 1.027) | -67 (-283 to 148)       | 0.54   |
| American countries (n=18)                     |                        |                         |        |
| All age groups                                |                        |                         |        |
| Males                                         | 1.065 (1.055 to 1.076) | 3224 (2726 to 3723)     | <0.001 |
| Females                                       | 1.016 (1.004 to 1.029) | 217 (51 to 383)         | 0.011  |
| Aged 15-24                                    |                        |                         |        |
| Males                                         | 0.989 (0.961 to 1.019) | -95 (-342 to 153)       | 0.45   |
| Females                                       | 0.963 (0.906 to 1.029) | -93 (-253 to 68)        | 0.26   |
| Aged 25-44                                    |                        |                         |        |
| Males                                         | 1.043 (1.020 to 1.067) | 787 (369 to 1204)       | <0.001 |
| Females                                       | 1.013 (0.979 to 1.051) | 62 (-104 to 228)        | 0.46   |
| Aged 45-64                                    |                        |                         |        |
| Males                                         | 1.050 (1.024 to 1.077) | 817 (401 to 1233)       | <0.001 |
| Females                                       | 1.003 (0.950 to 1.062) | 16 (-268 to 300)        | 0.91   |
| Aged 65+                                      |                        |                         |        |
| Males                                         | 1.047 (1.019 to 1.077) | 347 (143 to 552)        | 0.001  |
| Females                                       | 0.998 (0.950 to 1.052) | -2 (-75 to 71)          | 0.95   |
| Non-European and non-American countries (n=9) |                        |                         |        |
| All age groups                                |                        |                         |        |
| Males                                         | 0.938 (0.922 to 0.955) | -2408 (-3086 to -1730)  | <0.001 |
| Females                                       | 0.956 (0.936 to 0.977) | -699 (-1041 to -356)    | <0.001 |
| Aged 15-24                                    |                        |                         |        |
| Males                                         | 1.051 (0.978 to 1.135) | 130 (-61 to 322)        | 0.18   |
| Females                                       | 0.967 (0.835 to 1.148) | -47 (-270 to 176)       | 0.68   |
| Aged 25-44                                    |                        |                         |        |
| Males                                         | 0.982 (0.891 to 1.095) | -205 (-1398 to 989)     | 0.74   |
| Females                                       | 1.062 (0.923 to 1.250) | 286 (-409 to 981)       | 0.42   |
| Aged 45-64                                    |                        |                         |        |
| Males                                         | 0.932 (0.841 to 1.045) | -1044 (-2698 to 610)    | 0.22   |
| Females                                       | 0.971 (0.862 to 1.113) | -123 (-663 to 418)      | 0.66   |
| Aged 65+                                      |                        |                         |        |
| Males                                         | 0.828 (0.691 to 1.032) | -1697 (-3643 to 249)    | 0.09   |
| Females                                       | 0.873 (0.731 to 1.082) | -716 (-1803 to 372)     | 0.20   |

\* As listed in figure 1. Two countries (Belize and Kuwait) had no suicides in certain sex/age groups in 2000-2009 and thus were excluded from analyses stratified by sex and age group. The sum of age-specific excess suicides was not exactly equal to all-age excess suicides because age-specific estimates were based on age-specific time-trends, which may differ from trends in all-age suicide rates.
